# Supplementary material for: Smartphone-based reminder system to promote pelvic floor muscle training for the management of postnatal urinary incontinence: historical control study with propensity score-matched analysis
Source: PeerJ. 2018 Feb 9;6:e4372. doi: 10.7717/peerj.4372 (PMC5808312; doi:10.7717/peerj.4372)
Supplement: Supplemental Information 1 [file peerj-06-4372-s001.xls]

## Sheet: 20171013 All data
ID	sub	Baseline UI	After 8w UI	Age	BMI	Wt up	Prim	BW	PFMT	per day	per week	確率[3項目]	ペア	マッチした[3項目]
1	1	0	0	30	16.8	12	1	2932	1	1	7	0.21923	7	マッチした
2	1	0	0	31	20.7	17	1	3640	0			0.208366	15	マッチした
3	1	1	0	30	18.7	11	0	3226	0			0.139791	29	マッチした
4	1	0	0	36	24.2	8	1	2675	1	18	7	0.224725	2	マッチした
5	1	0	0	37	18.8	10	0	2704	0			0.174211	18	マッチした
6	1	0	0	32	25.6	0	1	2760	1	18	7	0.193773	24	マッチした
7	1	0	0	36	20.2	8	1	2480	1	2	7	0.24353	16	マッチした
8	1	0	0	32	20.7	12.1	0	3530	1	12	7	0.142561	3	マッチした
9	1	0	0	32	17.9	15	0	3138	0			0.151777		マッチなし
10	1	0	0	31	20.8	9.5	0	3104	0			0.137708	20	マッチした
11	1	0	0	34	18.4	7	1	2752	1	18	4	0.238392	23	マッチした
12	1	0	0	30	17.2	9	1	2703	0			0.217439	27	マッチした
13	1	0	0	33	21.6	12.5	1	3060	1	18	7	0.217022	6	マッチした
14	1	0	0	40	21.1	8	1	3579	0			0.267682	1	マッチした
15	1	1	0	36	19.7	10	1	2749	1	3	7	0.245954	25	マッチした
16	1	1	0	36	16.3	11	1	2722	0			0.262866	4	マッチした
17	1	0	0	33	18.7	9.5	1	2809	1	8	7	0.230226	12	マッチした
18	1	0	0	34	19.2	10	1	2835	0			0.234603	5	マッチした
19	1	0	0	28	18.2	9	1	3016	1	18	6	0.200657	9	マッチした
20	1	0	0	34	18.5	14.5	1	3178	1	18	7	0.237916	21	マッチした
21	1	0	0	42	21.1	6	1	2885	1	18	7	0.2827	28	マッチした
22	1	0	0	41	20.3	16	1	2722	1	1	7	0.279332	26	マッチした
23	1	0	0	33	19.5	11.2	1	4152	1	18	6	0.226528	22	マッチした
24	1	0	0	37	19.3	1.2	1	3460	0			0.254992	13	マッチした
25	1	0	0	36	25.4	10	1	3241	1	18	7	0.219288	8	マッチした
26	1	0	0	35	19.7	10	1	3456	1	10	3	0.239038	19	マッチした
27	1	0	0	31	19.7	12	1	3206	1	3	7	0.212725	14	マッチした
28	1	0	0	39	19.1	10	1	3213	1	1	5	0.270595	17	マッチした
29	1	0	0	31	16.6	10	0	2658	1	3	6	0.15132	10	マッチした
30	1	0	0	34	20.3	11.5	1	3718	1	18	7	0.229462	11	マッチした
31	1	0	0	28	22.5	14.8	0	3717	0			0.120045		マッチなし
32	0	0	0	35	19.9	11	0	2708	1	0	3	0.159731		マッチなし
33	0	1	1	31	19.8	9	1	3276	1	2	0	0.212286	14	マッチした
34	0	0	0	29	20	7	0	3056	0			0.131384		マッチなし
35	0	0	1	25	21.5	9	0	3115	0			0.111181		マッチなし
36	0	0	0	30	18.6	11	0	3128	0			0.140107	29	マッチした
37	0	0	1	24	15.6	7	1	2851	1	0	2	0.187764		マッチなし
38	0	0	0	27	20.3	9	0	2683	0			0.122179		マッチなし
39	0	0	0	35	20.1	10	0	3337	1	1	5	0.159028		マッチなし
40	0	0	0	36	21.3	11	1	3446	1	4	5	0.238254	21	マッチした
41	0	0	0	39	22.2	10	0	3282	0			0.172224		マッチなし
42	0	0	0	39	17.5	12	1	3236	1	0	1	0.278957	26	マッチした
43	0	0	0	33	19.8	12	1	3035	1	0	1	0.225152		マッチなし
44	0	0	0	31	18.7	14	1	3139	0			0.217151	27	マッチした
45	0	0	0	36	20.4	11	1	4090	1	1	3	0.242565	16	マッチした
46	0	0	1	28	16	9	1	3070	1	1	5	0.210073		マッチなし
47	0	0	0	29	21.1	10	1	3088	0			0.194567		マッチなし
48	0	1	0	36	19.3	8.5	0	2734	0			0.167027		マッチなし
49	0	0	0	29	18.9	10.4	1	2702	0			0.20377		マッチなし
50	0	0	1	38	18.6	14	1	3668	1	0	1	0.265779		マッチなし
51	0	1	0	30	18.4	11	1	3080	0			0.212131		マッチなし
52	0	0	0	31	18.3	9	0	2886	1	0	2	0.145682		マッチなし
53	0	1	1	30	19.8	11	0	3167	0			0.136357		マッチなし
54	0	0	1	34	21.1	10	0	2937	0			0.150669	10	マッチした
55	0	1	1	30	21.1	13	1	3498	0			0.200535	9	マッチした
56	0	1	0	36	18.5	10	1	2944	1	0	2	0.251838		マッチなし
57	0	1	0	36	18.4	7	1	2854	0			0.252333		マッチなし
58	0	0	0	30	20	9	0	2879	0			0.135741		マッチなし
59	0	1	1	25	20.9	9	0	3017	0			0.112745		マッチなし
60	0	0	0	37	20.7	10	1	3015	0			0.248079		マッチなし
61	0	0	0	37	20.8	7	0	3394	0			0.166792		マッチなし
62	0	1	0	36	19.8	17	1	3314	0			0.245468	25	マッチした
63	0	0	0	34	17.1	11	1	3122	1	2	3	0.244638		マッチなし
64	0	1	1	27	21.8	11	1	3247	0			0.180306		マッチなし
65	0	1	0	32	21.8	9	1	3231	0			0.209821		マッチなし
66	0	1	0	33	23.6	5	0	3214	1	1	1	0.13793	20	マッチした
67	0	0	0	21	18	11	0	2968	0			0.105501		マッチなし
68	0	0	0	30	17.9	13	0	3042	0			0.142334	3	マッチした
69	0	0	0	37	18.6	5.2	1	2772	1	18	0	0.258496		マッチなし
70	0	1	0	31	19.3	8	1	3330	1	1	3	0.214488		マッチなし
71	0	0	0	31	24.3	8.5	0	3520	1	2	5	0.127165		マッチなし
72	0	0	0	28	20.4	8.4	1	3340	0			0.191561		マッチなし
73	0	0	0	41	19.4	6	1	3255	0			0.284109		マッチなし
74	0	0	0	33	18.3	5	1	3504	0			0.23209		マッチなし
75	0	0	0	37	18.3	10	1	3179	1	0	2	0.260007		マッチなし
76	0	0	0	30	17.9	10.5	1	3019	0			0.214331		マッチなし
77	0	0	0	38	16.2	9.2	1	3850	0			0.278243		マッチなし
78	0	0	0	37	19.5	11.7	1	3687	1	2	7	0.253997		マッチなし
79	0	0	0	29	18.8	9	0	2450	0			0.135018		マッチなし
80	0	1	0	31	21.6	7	0	2706	1	0	2	0.135235		マッチなし
81	0	0	0	37	19.4	8.5	1	3360	1	1	3	0.254494	13	マッチした
82	0	0	0	25	23.2	7.5	0	2994	0			0.10685		マッチなし
83	0	0	0	31	20.7	8.5	1	3376	0			0.208366	15	マッチした
84	0	1	1	31	17.8	9.4	0	3694	1	1	4	0.147322		マッチなし
85	0	0	0	30	20.4	6	1	3096	0			0.203495		マッチなし
86	0	0	0	33	24.8	6	1	3588	0			0.203098		マッチなし
87	0	1	1	34	20.8	12.5	1	2628	1	0	3	0.227151	22	マッチした
88	0	0	0	36	18.3	7.2	1	3246	0			0.252828		マッチなし
89	0	0	1	39	19.1	6	0	2421	0			0.184127		マッチなし
90	0	0	0	32	18.4	8.8	1	3700	0			0.22499	2	マッチした
91	0	1	0	33	27	8	0	3172	1	15	7	0.127664		マッチなし
92	0	0	0	37	20.8	6	1	3232	0			0.24759		マッチなし
93	0	0	0	35	26.1	11	1	3070	0			0.209849		マッチなし
94	0	0	0	39	18.7	9	1	3400	0			0.27267	17	マッチした
95	0	0	0	35	15.4	7	0	2414	1	3	3	0.176216	18	マッチした
96	0	1	1	43	17.3	6	1	2682	0			0.311358		マッチなし
97	0	0	0	37	22.5	5	1	3080	0			0.239377	23	マッチした
98	0	0	0	38	26.2	0	1	3322	0			0.22873	11	マッチした
99	0	0	1	31	20.7	13	0	3368	0			0.13802		マッチなし
100	0	1	1	36	27	1	1	3208	0			0.212188		マッチなし
101	0	0	0	40	22.8	9	1	3592	0			0.259032		マッチなし
102	0	0	0	32	18.2	8	1	2915	1	1	1	0.225906		マッチなし
103	0	0	0	30	19	10	0	2949	0			0.138848		マッチなし
104	0	0	0	31	18.9	12	1	2956	0			0.216261		マッチなし
105	0	0	1	32	19.5	4.6	1	2978	0			0.219998	8	マッチした
106	0	0	0	28	22.2	8	1	3550	0			0.184356		マッチなし
107	0	0	0	30	17.3	9	0	2804	0			0.144266		マッチなし
108	0	0	0	38	19	12	1	3196	0			0.263736	4	マッチした
109	0	0	0	36	18.6	4.5	0	2780	0			0.169598		マッチなし
110	0	0	0	38	18.6	10	1	3150	0			0.265779		マッチなし
111	0	1	1	39	19.9	8	1	3146	0			0.266473	1	マッチした
112	0	0	0	35	19.3	7	1	2778	0			0.240952		マッチなし
113	0	0	0	32	19.5	9	1	2920	0			0.219998	7	マッチした
114	0	0	0	31	19.5	10	0	3612	0			0.141808		マッチなし
115	0	0	0	26	17	21	1	3231	0			0.193719	24	マッチした
116	0	0	0	33	17.2	12	0	3700	1	2	3	0.159129		マッチなし
117	0	0	0	37	19.9	10	1	3358	1	1	2	0.252014		マッチなし
118	0	1	1	36	19.5	8	1	3361	1	0	1	0.246929		マッチなし
119	0	1	1	32	20.5	10	1	2914	1	1	2	0.21553		マッチなし
120	0	1	0	32	20.5	10	1	3140	1	1	5	0.21553		マッチなし
121	0	0	0	28	17.4	12	1	3251	0			0.204044		マッチなし
122	0	0	0	25	20.3	7.6	0	3090	0			0.114329		マッチなし
123	0	0	0	38	20.6	7	1	3702	1	1	1	0.255668		マッチなし
124	0	1	0	28	22	8	1	3600	0			0.185146		マッチなし
125	0	0	0	38	23.1	9	0	3274	0			0.163665		マッチなし
126	0	0	0	40	21.8	7	1	3540	1	2	2	0.264098		マッチなし
127	0	0	0	31	19.7	13	0	3385	1	3	3	0.14117		マッチなし
128	0	0	1	36	20.8	10	0	3219	0			0.161625		マッチなし
129	0	0	0	33	22	10	0	3149	0			0.142996		マッチなし
130	0	0	0	39	17.6	5	1	2354	0			0.27843		マッチなし
131	0	0	0	36	22.1	4	1	3017	0			0.234467	5	マッチした
132	0	0	0	34	20.7	11	1	3474	1	3	4	0.227612		マッチなし
133	0	0	0	35	20.3	15	1	3315	0			0.236187		マッチなし
134	0	1	1	39	17	8	1	3380	0			0.281603	28	マッチした
135	0	0	0	29	18.9	14	0	2931	0			0.134712		マッチなし
136	0	0	0	28	20.3	13	1	3278	0			0.191968		マッチなし
137	0	0	0	32	23.2	11	1	2746	0			0.203797		マッチなし
138	0	0	0	36	19.2	6	1	2780	0			0.248395		マッチなし
139	0	0	0	34	17.8	13	0	3425	0			0.162084		マッチなし
140	0	1	0	34	18.8	9	1	4398	0			0.236492		マッチなし
141	0	0	0	20	20.8	2	0	3052	0			0.0954664		マッチなし
142	0	0	0	34	19.5	12	1	2930	0			0.233193		マッチなし
143	0	0	0	34	19.7	13	1	2926	0			0.232256		マッチなし
144	0	0	1	37	21.5	10	0	3506	0			0.164256		マッチなし
145	0	1	0	33	20.6	11.2	0	3028	0			0.147556		マッチなし
146	0	0	0	36	23.4	11	1	3140	0			0.228402	12	マッチした
147	0	0	0	28	20.1	7	0	2832	1	1	0	0.126855		マッチなし
148	0	0	0	34	18.2	9.5	1	2844	1	6	5	0.239346	19	マッチした
149	0	1	1	33	22.2	11	1	3362	1	0	2	0.21436		マッチなし
150	0	1	1	28	17.4	12	1	3192	1	1	7	0.204044		マッチなし
151	0	1	0	33	21.6	11	1	3268	0			0.217022	6	マッチした
152	0	1	1	35	20.5	7	1	3350	1	2	5	0.235242		マッチなし
